# Supplementary material
Source: publisher figshare collection journal article supplement (https://karger.figshare.com/ndownloader/files/8710897)
Supplement: Supplementary file 1 [file 8710897]

Supplemental Table 1. Markers used in Stages 1-3 of the analysis, with associated lod scores, for affecteds only (AO) and reduced penetrance models.

| Marker     | cM    | AO      | Reduced Penetrance |         |         |
|------------|-------|---------|--------------------|---------|---------|
|            |       | Stage 1 | Stage 1            | Stage 2 | Stage 3 |
| GATA198B05 | 3.7   | -2.15   | -2.70              |         |         |
| D22S420    | 5.0   | -1.04   | -1.52              |         |         |
| AGAT120    | 15.5  | -0.46   | -1.06              |         |         |
| D22S539    | 17.0  | 0.28    | -0.60              |         |         |
| D22S345    | 22.9  | -0.12   | -0.78              |         |         |
| ATTT019M   | 23.3  | -0.82   | -1.72              |         |         |
| D22S315    | 26.4  | 0.56    | -0.75              |         |         |
| D22S689    | 37.6  | 0.97    | -0.14              |         |         |
| D22S280    | 41.5  | 0.58    | -0.85              | -0.93   | -0.91   |
| rs4420793  | 53.44 |         |                    | -0.85   | -0.91   |
| rs240080   | 54.09 |         |                    | -0.86   | -0.91   |
| D22S685    | 43.5  | 2.14    | 1.40               | -0.87   | -0.91   |
| rs202916   | 54.88 |         |                    | -0.87   | -0.91   |
| rs134215   | 55.64 |         |                    | -0.96   | -0.91   |
| rs138794   | 56.28 |         |                    |         | -0.96   |
| rs1076139  | 56.36 |         |                    | 1.34    |         |
| rs5999860  | 56.89 |         |                    | 1.58    |         |
| rs5750116  | 56.99 |         |                    |         | 1.81    |
| rs1573708  | 57.64 |         |                    | 1.81    | 1.81    |
| D22S683    | 46.5  | 2.58    | 1.81               | 1.81    | 1.81    |
| rs1557540  | 58.36 |         |                    | 1.81    | 1.81    |
| D22S283    | 47.2  | 2.55    | 1.79               | 1.81    | 1.81    |
| rs6000293  | 59.09 |         |                    | 1.76    | 1.76    |
| rs6000386  | 59.78 |         |                    | 1.70    | 1.69    |
| D22S692    | 48.8  | 2.27    | 1.49               | 1.65    | 1.64    |
| rs5750310  | 60.53 |         |                    | 1.61    | 1.61    |
| rs4821567  | 61.16 |         |                    | 1.47    | 1.52    |
| rs5750370  | 61.75 |         |                    |         | 1.52    |
| rs5756489  | 61.78 |         |                    | 1.42    |         |
| rs5995385  | 62.38 |         |                    | 1.36    | 1.52    |
| D22S1045   | 51.3  | 1.87    | 1.07               | 1.34    | 1.52    |
| D22S445    | 51.4  | 1.82    | 1.01               | 1.28    | 1.44    |
| rs6000645  | 62.95 |         |                    | 1.20    | 1.30    |
| rs4328731  | 63.40 |         |                    |         | -0.86   |
| rs133710   | 63.5  |         |                    | 0.84    |         |
| rs5750576  | 64.07 |         |                    | -1.29   | -0.90   |
| rs7292074  | 64.86 |         |                    |         | -1.14   |
| rs713863   | 64.76 |         |                    | -1.67   |         |
| rs139412   | 65.23 |         |                    |         | -2.08   |
| rs11704525 | 65.33 |         |                    | -1.74   |         |
| rs107140   | 66.06 |         |                    | -1.83   | -2.07   |
| D22S423    | 55.1  | -0.01   | -1.28              | -1.92   | -2.04   |
| D22S274    | 62.7  | -0.64   | -1.29              |         |         |
| D22S532    | 65.3  | -0.86   | -1.15              |         |         |
| D22S1169   | 78.7  | -1.74   | -1.52              |         |         |
| TCTA014M   | 79.5  | -2.71   | -2.91              |         |         |

Supplemental Table 2. The probability that the observed allele at each Stage 1 marker locus shares the same FGL as the D22S683 tagging allele, as estimated from sampled inheritance vectors.

| Marker     | Affected Subject |        |        |        |        |        |       |        |
|------------|------------------|--------|--------|--------|--------|--------|-------|--------|
|            | IV.4.a           | IV.4.b | IV.3.a | IV.3.b | IV.3.c | IV.2.a | V.1.a | IV.2.b |
| GATA198B05 | 0.12             | 0.12   | 0.11   | 0.11   | 0.02   | 0.88   | 0     | 0.88   |
| D22S420    | 0.16             | 0.16   | 0.15   | 0.14   | 0.02   | 0.78   | 0     | 0.78   |
| AGAT120    | 0.44             | 0.44   | 0.44   | 0.44   | 0      | 0.21   | 0     | 0.21   |
| D22S539    | 0.55             | 0.55   | 0.55   | 0.55   | 0      | 0.17   | 0.04  | 0.17   |
| D22S345    | 0.97             | 0.97   | 0.97   | 0.97   | 0      | 0.01   | 0.01  | 0.01   |
| ATTT019M   | 1                | 1      | 1      | 1      | 0      | 0      | 0     | 0      |
| D22S315    | 1                | 1      | 1      | 1      | 0.13   | 0      | 0     | 0      |
| D22S689    | 0.98             | 0.98   | 0.98   | 0.98   | 0.6    | 0.01   | 0.01  | 0.01   |
| D22S280    | 1                | 1      | 1      | 1      | 0.78   | 0.01   | 0.01  | 0      |
| D22S685    | 1                | 1      | 1      | 1      | 0.86   | 0.37   | 0.37  | 0.37   |
| D22S683    | 1                | 1      | 1      | 1      | 1      | 1      | 1     | 1      |
| D22S283    | 1                | 1      | 1      | 1      | 0.98   | 0.97   | 1     | 0.98   |
| D22S692    | 0.65             | 0.65   | 0.65   | 0.65   | 0.61   | 0.86   | 0.98  | 0.87   |
| D22S1045   | 0.4              | 0.4    | 0.4    | 0.4    | 0.33   | 0.75   | 0.97  | 0.71   |
| D22S445    | 0.38             | 0.38   | 0.37   | 0.37   | 0.31   | 0.74   | 0.97  | 0.7    |
| D22S423    | 0                | 0      | 0      | 0      | 0      | 0.55   | 0.95  | 0.43   |
| D22S274    | 0                | 0      | 0      | 0      | 0      | 0.14   | 0.93  | 0.15   |
| D22S532    | 0                | 0      | 0      | 0      | 0      | 0      | 0.93  | 0      |
| D22S1169   | 0                | 0      | 0      | 0      | 0      | 0      | 0.92  | 0      |
| TCTA014M   | 0                | 0      | 0      | 0      | 0      | 0      | 0.92  | 0      |

Supplementary Table 3: Exome variant counts in each of the five sequenced individuals, in the Stage 3 region of interest, for all 68 variants that appeared in at least one exome. The frequency of the variant allele was obtained from HapMap-CEU, 1000 Genomes – EUR(\*), or the NHLBI exome sequencing project exome variant server(\*\*). Variants with a frequency of 5% or less are highlighted in **bold**.

| Name               | Build 37<br>position | Variant<br>Frequency | Exomed individuals |          |          |          |          |
|--------------------|----------------------|----------------------|--------------------|----------|----------|----------|----------|
|                    |                      |                      | II.1.b             | IV.3.a   | IV.4.a   | V.1.a    | IV.5.a   |
| rs743810           | 35,742,925           | 0.32                 | 1                  | 1        | 1        | 1        | 1        |
| rs133427*          | 35,815,880           | 0.15                 | 0                  | 0        | 0        | 0        | 1        |
| rs7292             | 36,007,045           | 0.55                 | 1                  | 1        | 0        | 1        | 0        |
| rs7293             | 36,007,075           | 0.53                 | 1                  | 1        | 0        | 1        | 0        |
| <b>rs34014315*</b> | <b>36,055,406</b>    | <b>0.02</b>          | <b>0</b>           | <b>1</b> | <b>0</b> | <b>0</b> | <b>0</b> |
| rs17723764*        | 36,122,517           | 0.23                 | 0                  | 1        | 0        | 0        | 0        |
| rs2076671          | 36,122,930           | 0.36                 | 2                  | 1        | 2        | 2        | 2        |
| rs2076672          | 36,123,083           | 0.18                 | 0                  | 1        | 0        | 0        | 0        |
| rs2076673          | 36,124,860           | 0.35                 | 2                  | 1        | 2        | 2        | 2        |
| rs132618           | 36,537,500           | 0.36                 | 2                  | 1        | 2        | 1        | 0        |
| rs61731692*        | 36,537,725           | 0.08                 | 0                  | 1        | 0        | 0        | 0        |
| rs3827346*         | 36,537,893           | 0.29                 | 0                  | 0        | 0        | 1        | 0        |
| rs132642           | 36,545,137           | 0.94                 | 2                  | 2        | 2        | 2        | 0        |
| rs132653           | 36,556,823           | 0.80                 | 2                  | 2        | 2        | 2        | 0        |
| rs6000172          | 36,587,202           | 0.62                 | 1                  | 2        | 1        | 1        | 0        |
| rs6000174          | 36,587,279           | 0.62                 | 1                  | 2        | 1        | 1        | 0        |
| rs2227167          | 36,587,486           | 0.62                 | 1                  | 2        | 1        | 1        | 0        |
| rs2227168          | 36,587,511           | 0.63                 | 1                  | 2        | 1        | 1        | 0        |
| rs132700           | 36,587,704           | 0.29                 | 1                  | 0        | 1        | 1        | 1        |
| rs2227169          | 36,587,952           | 0.61                 | 1                  | 2        | 1        | 1        | 0        |
| rs2007468          | 36,591,380           | 0.67                 | 1                  | 2        | 1        | 1        | 0        |
| rs9610445          | 36,597,744           | 0.13                 | 0                  | 1        | 0        | 0        | 0        |
| rs80587            | 36,598,049           | 0.60                 | 2                  | 2        | 1        | 1        | 1        |
| rs132736           | 36,598,058           | 0.60                 | 2                  | 2        | 1        | 1        | 1        |
| rs6000181          | 36,598,081           | 0.09                 | 0                  | 1        | 0        | 0        | 0        |
| rs132760           | 36,623,731           | 1.00                 | 2                  | 2        | 2        | 2        | 2        |
| rs2239785          | 36,661,330           | 0.70                 | 1                  | 2        | 1        | 2        | 2        |
| rs136174           | 36,661,536           | 0.84                 | 1                  | 2        | 1        | 2        | 2        |
| rs136175           | 36,661,566           | 0.84                 | 1                  | 2        | 1        | 2        | 2        |
| rs136176           | 36,661,646           | 0.84                 | 1                  | 2        | 1        | 2        | 2        |
| rs136177           | 36,661,842           | 0.83                 | 1                  | 2        | 1        | 2        | 2        |
| rs2269529          | 36,684,354           | 0.28                 | 0                  | 0        | 1        | 0        | 0        |
| rs2269530          | 36,684,358           | 0.28                 | 0                  | 0        | 1        | 0        | 0        |
| <b>.***</b>        | <b>36,684,412</b>    | <b>0.0005</b>        | <b>0</b>           | <b>0</b> | <b>1</b> | <b>0</b> | <b>0</b> |
| <b>.***</b>        | <b>36,689,462</b>    | <b>0.0002</b>        | <b>1</b>           | <b>1</b> | <b>1</b> | <b>1</b> | <b>0</b> |
| rs710181           | 36,691,607           | 0.98                 | 2                  | 2        | 2        | 2        | 2        |
| rs2277841          | 36,900,271           | 0.67                 | 1                  | 2        | 1        | 2        | 2        |
| rs760718           | 36,900,806           | 0.51                 | 1                  | 2        | 1        | 2        | 2        |
| rs1048012          | 37,163,329           | 0.80                 | 2                  | 2        | 2        | 2        | 2        |
| rs2072708          | 37,267,767           | 0.64                 | 1                  | 2        | 2        | 2        | 1        |
| rs2072712          | 37,271,802           | 0.11                 | 0                  | 0        | 1        | 0        | 0        |
| rs2075939          | 37,271,882           | 0.82                 | 1                  | 2        | 2        | 2        | 2        |
| rs11552115*        | 37,273,742           | 0.11                 | 0                  | 0        | 1        | 0        | 0        |
| rs1801117*         | 37,329,999           | 0.16                 | 1                  | 1        | 1        | 0        | 0        |
| rs2235321          | 37,462,926           | 0.37                 | 1                  | 0        | 0        | 1        | 0        |

|                    |                   |              |          |          |          |          |          |
|--------------------|-------------------|--------------|----------|----------|----------|----------|----------|
| rs855791           | 37,462,936        | 0.60         | 1        | 0        | 1        | 1        | 1        |
| rs4820268          | 37,469,591        | 0.54         | 1        | 0        | 1        | 1        | 1        |
| rs2111833          | 37,480,797        | 0.33         | 1        | 0        | 0        | 1        | 0        |
| rs2235324          | 37,485,724        | 0.39         | 1        | 0        | 0        | 1        | 0        |
| rs11704654         | 37,499,386        | 0.16         | 0        | 0        | 1        | 0        | 1        |
| rs228953           | 37,531,436        | 0.42         | 1        | 0        | 0        | 0        | 0        |
| <b>rs17812681*</b> | <b>37,578,388</b> | <b>0.014</b> | <b>0</b> | <b>0</b> | <b>1</b> | <b>0</b> | <b>0</b> |
| rs229519           | 37,578,579        | 0.45         | 0        | 0        | 1        | 1        | 1        |
| rs17812699         | 37,578,652        | 0.11         | 0        | 0        | 1        | 0        | 0        |
| rs7290488          | 37,581,383        | 0.19         | 2        | 1        | 1        | 1        | 0        |
| rs229526           | 37,581,422        | 0.18         | 0        | 1        | 0        | 0        | 0        |
| rs229527           | 37,581,485        | 0.46         | 0        | 1        | 0        | 1        | 1        |
| rs2071710          | 37,603,021        | 0.34         | 0        | 0        | 0        | 1        | 1        |
| rs229569           | 37,603,051        | 0.40         | 0        | 0        | 0        | 1        | 1        |
| rs86582            | 37,603,390        | 0.40         | 0        | 0        | 0        | 1        | 1        |
| rs86583*           | 37,603,744        | 0.42         | 0        | 0        | 0        | 1        | 1        |
| rs1064498*         | 37,622,815        | 0.25         | 0        | 0        | 0        | 1        | 2        |
| rs2239774          | 37,637,653        | 0.17         | 0        | 0        | 0        | 1        | 1        |
| rs2239822          | 37,699,377        | 0.70         | 1        | 2        | 1        | 1        | 0        |
| rs8142615          | 37,770,066        | 0.42         | 0        | 1        | 0        | 1        | 0        |
| rs7292751          | 37,770,357        | 0.46         | 0        | 1        | 0        | 1        | 0        |
| rs2071856          | 37,770,630        | 0.29         | 2        | 1        | 1        | 1        | 1        |
| rs2071857          | 37,771,158        | 0.45         | 0        | 1        | 0        | 1        | 1        |
